# Supplementary material for: Morphological and simple sequence repeat (SSR)-based diversity of Capsicum germplasm characterizes population structure and enables marker-assisted selection for Phytophthora capsici resistance
Source: Research Square preprint supplement (doi:10.21203/rs.3.rs-8087544/v1), 2025-12-03
Supplement: Supplementary file 2 [file f8c45384f8357e251b459f87.docx]

**Morphological and simple sequence repeat (SSR)-based diversity of *Capsicum* germplasm characterizes population structure and enables marker-assisted selection for *Phytophthora capsici* resistance**

Deepa Jaganathan1,2, Jessica Michelle Gibbs1, Noel Thomas1, Theodore McAvoy1, Mahnaz Azad3, Miaoying Tian3, Dennis N. Lozada4, William Hendricks Railey5, Amol N. Nankar1,2*

**1**Department of Horticulture, University of Georgia, Tifton, GA 37193, United States

**2**Institute of Plant Breeding, Genetics and Genomics (IPBGG), University of Georgia, Tifton, GA 37193, United States

**3**Department of Plant Pathology, University of Georgia, Tifton, GA 37193, United States

4Department of Plant and Environmental Sciences and Chile Pepper Institute, New Mexico State University, Las Cruces, NM 88003, United States

5Abraham Balwin Agricultural College, Tifton, GA 31793, United States

***Corresponding author:** [amolnankar@uga.edu](mailto:amolnankar@uga.edu)

**Supplementary Tables**

| **Supplementary Table 1** Results of principal component analysis of UGA-Capsi-Core pepper accessions | | | | | | | | |
| --- | --- | --- | --- | --- | --- | --- | --- | --- |
|  | **PC1** | **PC2** | **PC3** | **PC4** | **PC5** | **PC6** | **PC7** | **PC8** |
| **Importance of components** | | | | | | | | |
| **Standard deviation** | 1.46 | 1.129 | 1.105 | 0.996 | 0.923 | 0.885 | 0.704 | 0.503 |
| **Eigen value** | 2.132 | 1.274 | 1.221 | 0.991 | 0.853 | 0.782 | 0.495 | 0.253 |
| **Proportion of Variance** | 0.2665 | 0.1593 | 0.1526 | 0.1239 | 0.1066 | 0.0977 | 0.0619 | 0.0316 |
| **Cumulative Proportion** | 0.2665 | 0.4257 | 0.5783 | 0.7022 | 0.8088 | 0.9064 | 0.9684 | 1 |
| **Trait contribution** | | | | | | | | |
| Germination | 8.52 | 0.61 | 8.52 | 48.74 | 2.04 | 17.41 | 14.16 | 0.00 |
| Plant Vigor | 12.91 | 8.9 | 20.19 | 0.73 | 20.67 | 0.49 | 35.62 | 0.49 |
| Days to Flowering | 0.93 | 24.77 | 27.98 | 0.16 | 13.85 | 15.17 | 17.14 | 0.01 |
| NuMini Beller of Lobes | 12.35 | 6.31 | 0.1 | 32.84 | 11.98 | 16.69 | 19.47 | 0.27 |
| Plant Height | 29.35 | 13.74 | 1.42 | 1.16 | 4.84 | 0.64 | 0.17 | 48.67 |
| Main Stem Height | 27.85 | 16.98 | 4.18 | 0.05 | 0.23 | 0.53 | 2.21 | 47.97 |
| Lodging | 1.52 | 6.01 | 28.38 | 12.06 | 45.73 | 3.58 | 0.13 | 2.59 |
| Days to Maturity | 6.56 | 22.68 | 9.23 | 4.27 | 0.64 | 45.5 | 11.11 | 0.00 |

**Note:** Values <0.01 are reported as 0.00 due to rounding.

| **Supplementary Table 2.** Correlation coefficient among quantitative traits of UGA-Capsi-Core pepper accessions | | | | | | | | |
| --- | --- | --- | --- | --- | --- | --- | --- | --- |
|  | **Germination** | **Plant Vigor** | **Days to Flowering** | **NuMini Beller of Lobes** | **Plant Height** | **Main Stem Height** | **Lodging** | **Days to Maturity** |
| **Germination** | 1*** | 0.286*** | 0.058ns | -0.016ns | 0.175*** | 0.183*** | 0.078ns | -0.058ns |
| **Plant Vigor** | 0.286*** | 1*** | -0.034ns | -0.274*** | 0.15*** | 0.169*** | 0.197*** | -0.172*** |
| **Days to Flowering** | 0.058ns | -0.034ns | 1*** | -0.058*** | 0.126ns | 0.088ns | -0.011ns | -0.175*** |
| **Number of Lobes** | -0.016ns | -0.274*** | -0.058*** | 1*** | -0.24*** | -0.192*** | -0.092* | 0.144** |
| **Plant Height** | 0.175*** | 0.15*** | 0.126ns | -0.24*** | 1*** | 0.727*** | 0.102* | -0.123** |
| **Main Stem Height** | 0.183*** | 0.169*** | 0.088ns | -0.192*** | 0.727*** | 1*** | -0.055ns | -0.138*** |
| **Lodging** | 0.078ns | 0.197*** | -0.011ns | -0.092* | 0.102* | -0.055ns | 1*** | -0.025ns |
| **Days to Maturity** | -0.058ns | -0.172*** | -0.175*** | 0.144** | -0.123** | -0.138*** | -0.025ns | 1*** |

**Note:** ***p < 0.001; **p < 0.01; **p < 0.05; ns = non-significant.*

| **Supplementary Table 3:** Number of alleles observed before and after binning using TANDEM | | |
| --- | --- | --- |
| **Marker** | **No of Allele** | **No of allele after binning** |
| SSR9 | 8 | 7 |
| SSR3 | 9 | 9 |
| HpmsE034 | 13 | 12 |
| HpmsE062 | 15 | 15 |
| ZL6726 | 13 | 13 |
| HpmshsMADS | 14 | 14 |
| CAMS089 | 16 | 16 |
| U196349 | 16 | 16 |
| CONTIG1896 | 7 | 7 |
| CaNB-5170 | 14 | 14 |
| EPMS 331 | 11 | 11 |
| EPMS 342 | 24 | 24 |
| EPMS 376 | 17 | 17 |
| EPMS 418 | 18 | 18 |
| EPMS 480 | 16 | 16 |
| EPMS 501 | 13 | 13 |
| GPMS 117 | 22 | 21 |
| Hpms1-1 | 14 | 14 |
| EPMS 399 | 9 | 9 |
| EPMS 404 | 8 | 8 |
| EPMS 542 | 6 | 6 |
| GPMS 112 | 9 | 9 |
| HPMS1-117 | 10 | 10 |
| HPMS 2-2 | 9 | 9 |

**Supplementary Table 4:** Clustering of UGA-Capsi-Core accessions based on Phytophthora linked SSR marker screening

| **Accessions** | **Cluster** | **Species** | **Varietal group** |
| --- | --- | --- | --- |
| UGA-CAPS-032 | 1 | C. annuum | Banana |
| UGA-CAPS-050 | 1 | C. annuum | Banana |
| UGA-CAPS-051 | 1 | C. annuum | Banana |
| UGA-CAPS-172 | 1 | C. annuum | Banana |
| UGA-CAPS-173 | 1 | C. annuum | Banana |
| UGA-CAPS-206 | 1 | C. annuum | Banana |
| UGA-CAPS-218 | 1 | C. annuum | Banana |
| UGA-CAPS-044 | 1 | C. annuum | Bell |
| UGA-CAPS-178 | 1 | C. annuum | Bell |
| UGA-CAPS-253 | 1 | C. annuum | Bell |
| UGA-CAPS-254 | 1 | C. annuum | Bell |
| UGA-CAPS-260 | 1 | C. annuum | Bell |
| UGA-CAPS-353 | 1 | C. annuum | Bell |
| UGA-CAPS-354 | 1 | C. annuum | Bell |
| UGA-CAPS-356 | 1 | C. annuum | Bell |
| UGA-CAPS-357 | 1 | C. annuum | Bell |
| UGA-CAPS-368 | 1 | C. annuum | Bell |
| UGA-CAPS-369 | 1 | C. annuum | Bell |
| UGA-CAPS-370 | 1 | C. annuum | Bell |
| UGA-CAPS-371 | 1 | C. annuum | Bell |
| UGA-CAPS-372 | 1 | C. annuum | Bell |
| UGA-CAPS-373 | 1 | C. annuum | Bell |
| UGA-CAPS-375 | 1 | C. annuum | Bell |
| UGA-CAPS-376 | 1 | C. annuum | Bell |
| UGA-CAPS-381 | 1 | C. annuum | Bell |
| UGA-CAPS-222 | 1 | C. annuum | Cherry |
| UGA-CAPS-374 | 1 | C. annuum | Conical (Bell) |
| UGA-CAPS-068 | 1 | C. annuum | Habanero |
| UGA-CAPS-041 | 1 | C. annuum | Italian Frier |
| UGA-CAPS-043 | 1 | C. annuum | Italian Frier |
| UGA-CAPS-046 | 1 | C. annuum | Italian Frier |
| UGA-CAPS-047 | 1 | C. annuum | Italian Frier |
| UGA-CAPS-055 | 1 | C. annuum | Italian Frier |
| UGA-CAPS-066 | 1 | C. annuum | Italian Frier |
| UGA-CAPS-076 | 1 | C. annuum | Italian Frier |
| UGA-CAPS-079 | 1 | C. annuum | Italian Frier |
| UGA-CAPS-174 | 1 | C. annuum | Italian Frier |
| UGA-CAPS-177 | 1 | C. annuum | Italian Frier |
| UGA-CAPS-179 | 1 | C. annuum | Italian Frier |
| UGA-CAPS-182 | 1 | C. annuum | Italian Frier |
| UGA-CAPS-204 | 1 | C. annuum | Italian Frier |
| UGA-CAPS-214 | 1 | C. annuum | Italian Frier |
| UGA-CAPS-216 | 1 | C. annuum | Italian Frier |
| UGA-CAPS-217 | 1 | C. annuum | Italian Frier |
| UGA-CAPS-219 | 1 | C. annuum | Italian Frier |
| UGA-CAPS-220 | 1 | C. annuum | Italian Frier |
| UGA-CAPS-221 | 1 | C. annuum | Italian Frier |
| UGA-CAPS-327 | 1 | C. annuum | Italian Frier |
| UGA-CAPS-033 | 1 | C. annuum | Finger Hot |
| UGA-CAPS-053 | 1 | C. annuum | Finger Hot |
| UGA-CAPS-049 | 1 | C. annuum | Jalapeno |
| UGA-CAPS-175 | 1 | C. annuum | Jalapeno |
| UGA-CAPS-215 | 1 | C. annuum | Jalapeno |
| UGA-CAPS-264 | 1 | C. annuum | Jalapeno |
| UGA-CAPS-265 | 1 | C. annuum | Jalapeno |
| UGA-CAPS-319 | 1 | C. annuum | Jalapeno |
| UGA-CAPS-323 | 1 | C. annuum | Jalapeno |
| UGA-CAPS-074 | 1 | C. annuum | Lamayo |
| UGA-CAPS-113 | 1 | C. annuum | Lamayo |
| UGA-CAPS-268 | 1 | C. annuum | Lamayo |
| UGA-CAPS-048 | 1 | C. annuum | Mini Bell |
| UGA-CAPS-069 | 1 | C. annuum | Mini Bell |
| UGA-CAPS-106 | 1 | C. annuum | Mini Bell |
| UGA-CAPS-109 | 1 | C. annuum | Mini Bell |
| UGA-CAPS-110 | 1 | C. annuum | Mini Bell |
| UGA-CAPS-112 | 1 | C. annuum | Mini Bell |
| UGA-CAPS-118 | 1 | C. annuum | Mini Bell |
| UGA-CAPS-119 | 1 | C. annuum | Mini Bell |
| UGA-CAPS-181 | 1 | C. annuum | Mini Bell |
| UGA-CAPS-262 | 1 | C. annuum | Mini Bell |
| UGA-CAPS-263 | 1 | C. annuum | Mini Bell |
| UGA-CAPS-031 | 1 | C. annuum | Mini Sweet |
| UGA-CAPS-036 | 1 | C. annuum | Mini Sweet |
| UGA-CAPS-040 | 1 | C. annuum | Mini Sweet |
| UGA-CAPS-045 | 1 | C. annuum | Mini Sweet |
| UGA-CAPS-067 | 1 | C. annuum | Mini Sweet |
| UGA-CAPS-104 | 1 | C. annuum | Mini Sweet |
| UGA-CAPS-105 | 1 | C. annuum | Mini Sweet |
| UGA-CAPS-107 | 1 | C. annuum | Mini Sweet |
| UGA-CAPS-108 | 1 | C. annuum | Mini Sweet |
| UGA-CAPS-111 | 1 | C. annuum | Mini Sweet |
| UGA-CAPS-114 | 1 | C. annuum | Mini Sweet |
| UGA-CAPS-115 | 1 | C. annuum | Mini Sweet |
| UGA-CAPS-116 | 1 | C. annuum | Mini Sweet |
| UGA-CAPS-117 | 1 | C. annuum | Mini Sweet |
| UGA-CAPS-120 | 1 | C. annuum | Mini Sweet |
| UGA-CAPS-121 | 1 | C. annuum | Mini Sweet |
| UGA-CAPS-146 | 1 | C. annuum | Mini Sweet |
| UGA-CAPS-171 | 1 | C. annuum | Mini Sweet |
| UGA-CAPS-205 | 1 | C. annuum | Mini Sweet |
| UGA-CAPS-212 | 1 | C. annuum | Mini Sweet |
| UGA-CAPS-252 | 1 | C. annuum | Mini Sweet |
| UGA-CAPS-261 | 1 | C. annuum | Mini Sweet |
| UGA-CAPS-266 | 1 | C. annuum | Mini Sweet |
| UGA-CAPS-267 | 1 | C. annuum | Mini Sweet |
| UGA-CAPS-269 | 1 | C. annuum | Mini Sweet |
| UGA-CAPS-324 | 1 | C. annuum | Mini Sweet |
| UGA-CAPS-325 | 1 | C. annuum | Mini Sweet |
| UGA-CAPS-326 | 1 | C. annuum | Mini Sweet |
| UGA-CAPS-328 | 1 | C. annuum | Mini Sweet |
| UGA-CAPS-213 | 1 | C. annuum | Mini Sweet |
| UGA-CAPS-029 | 1 | C. annuum | Pod type |
| UGA-CAPS-038 | 1 | C. annuum | Pumpkin Shape |
| UGA-CAPS-052 | 1 | C. annuum | Pumpkin Shape |
| UGA-CAPS-078 | 1 | C. annuum | Pumpkin Shape |
| UGA-CAPS-321 | 1 | C. annuum | Pumpkin Shape |
| UGA-CAPS-322 | 1 | C. annuum | Pumpkin Shape |
| UGA-CAPS-034 | 1 | C. annuum | Pumpkin Shape |
| UGA-CAPS-035 | 1 | C. annuum | Pumpkin Shape |
| UGA-CAPS-039 | 1 | C. annuum | Pumpkin Shape |
| UGA-CAPS-042 | 1 | C. annuum | Pumpkin Shape |
| UGA-CAPS-054 | 1 | C. annuum | Pumpkin Shape |
| UGA-CAPS-075 | 1 | C. annuum | Serrano |
| UGA-CAPS-320 | 1 | C. annuum | Snack Type |
| UGA-CAPS-073 | 1 | C. annuum | Tomato |
| UGA-CAPS-037 | 1 | C. annuum | Italian Frier |
| UGA-CAPS-102 | 1 | C. annuum | Mini Bell |
| UGA-CAPS-400 | 1 | C. annuum | Cayenne |
| UGA-CAPS-401 | 1 | C. annuum | Banana |
| UGA-CAPS-402 | 1 | C. annuum | Bell |
| UGA-CAPS-404 | 1 | C. annuum | Finger Hot |
| UGA-CAPS-406 | 1 | C. annuum | Finger Hot |
| UGA-CAPS-409 | 1 | C. annuum | Habanero |
| UGA-CAPS-419 | 1 | C. annuum | Finger Hot |
| UGA-CAPS-425 | 1 | C. annuum | Finger Hot |
| UGA-CAPS-426 | 1 | C. annuum | Jalapeno |
| UGA-CAPS-427 | 1 | C. annuum | Pimiento |
| UGA-CAPS-428 | 1 | C. annuum | Bell |
| UGA-CAPS-429 | 1 | C. annuum | Finger Hot |
| UGA-CAPS-430 | 1 | C. annuum | Mini Sweet |
| UGA-CAPS-431 | 1 | C. annuum | Mini Sweet |
| UGA-CAPS-432 | 1 | C. baccatum | Finger Hot |
| UGA-CAPS-433 | 1 | C. baccatum | Aleppo |
| UGA-CAPS-437 | 1 | C. chinense | Aleppo |
| UGA-CAPS-447 | 1 | C. annuum | Jalapeno |
| UGA-CAPS-448 | 1 | C. annuum | Anaheim |
| UGA-CAPS-449 | 1 | C. annuum | Anaheim |
| UGA-CAPS-450 | 1 | C. annuum | Anaheim |
| UGA-CAPS-451 | 1 | C. annuum | Anaheim |
| UGA-CAPS-452 | 1 | C. annuum | Anaheim |
| UGA-CAPS-453 | 1 | C. annuum | Bell |
| UGA-CAPS-454 | 1 | C. annuum | Banana |
| UGA-CAPS-455 | 1 | C. annuum | Bell |
| UGA-CAPS-456 | 1 | C. annuum | Cayenne |
| UGA-CAPS-457 | 1 | C. annuum | Bell |
| UGA-CAPS-458 | 1 | C. annuum | Jalapeno |
| UGA-CAPS-459 | 1 | C. annuum | Jalapeno |
| UGA-CAPS-460 | 1 | C. annuum | Jalapeno |
| UGA-CAPS-461 | 1 | C. annuum | Jalapeno |
| UGA-CAPS-462 | 1 | C. annuum | Jalapeno |
| UGA-CAPS-463 | 1 | C. annuum | Jalapeno |
| UGA-CAPS-464 | 1 | C. annuum | Bird’s Eye |
| UGA-CAPS-465 | 1 | C. annuum | Cayenne |
| UGA-CAPS-007 | 2 | C. annuum | Banana |
| UGA-CAPS-008 | 2 | C. annuum | Banana |
| UGA-CAPS-020 | 2 | C. annuum | Banana |
| UGA-CAPS-024 | 2 | C. annuum | Banana |
| UGA-CAPS-025 | 2 | C. annuum | Banana |
| UGA-CAPS-026 | 2 | C. annuum | Banana |
| UGA-CAPS-027 | 2 | C. annuum | Banana |
| UGA-CAPS-082 | 2 | C. annuum | Banana |
| UGA-CAPS-089 | 2 | C. annuum | Banana |
| UGA-CAPS-132 | 2 | C. annuum | Banana |
| UGA-CAPS-136 | 2 | C. annuum | Banana |
| UGA-CAPS-138 | 2 | C. annuum | Banana |
| UGA-CAPS-141 | 2 | C. annuum | Banana |
| UGA-CAPS-144 | 2 | C. annuum | Banana |
| UGA-CAPS-153 | 2 | C. annuum | Banana |
| UGA-CAPS-154 | 2 | C. annuum | Banana |
| UGA-CAPS-155 | 2 | C. annuum | Banana |
| UGA-CAPS-161 | 2 | C. annuum | Banana |
| UGA-CAPS-163 | 2 | C. annuum | Banana |
| UGA-CAPS-164 | 2 | C. annuum | Banana |
| UGA-CAPS-165 | 2 | C. annuum | Banana |
| UGA-CAPS-166 | 2 | C. annuum | Banana |
| UGA-CAPS-167 | 2 | C. annuum | Banana |
| UGA-CAPS-223 | 2 | C. annuum | Banana |
| UGA-CAPS-230 | 2 | C. annuum | Banana |
| UGA-CAPS-303 | 2 | C. annuum | Banana |
| UGA-CAPS-304 | 2 | C. annuum | Banana |
| UGA-CAPS-305 | 2 | C. annuum | Banana |
| UGA-CAPS-306 | 2 | C. annuum | Banana |
| UGA-CAPS-307 | 2 | C. annuum | Banana |
| UGA-CAPS-070 | 2 | C. annuum | Banana |
| UGA-CAPS-168 | 2 | C. annuum | Bell |
| UGA-CAPS-255 | 2 | C. annuum | Bell |
| UGA-CAPS-257 | 2 | C. annuum | Bell |
| UGA-CAPS-259 | 2 | C. annuum | Bell |
| UGA-CAPS-277 | 2 | C. annuum | Bell |
| UGA-CAPS-311 | 2 | C. annuum | Bell |
| UGA-CAPS-315 | 2 | C. annuum | Bell |
| UGA-CAPS-355 | 2 | C. annuum | Bell |
| UGA-CAPS-358 | 2 | C. annuum | Bell |
| UGA-CAPS-359 | 2 | C. annuum | Bell |
| UGA-CAPS-360 | 2 | C. annuum | Bell |
| UGA-CAPS-361 | 2 | C. annuum | Bell |
| UGA-CAPS-362 | 2 | C. annuum | Bell |
| UGA-CAPS-364 | 2 | C. annuum | Bell |
| UGA-CAPS-365 | 2 | C. annuum | Bell |
| UGA-CAPS-366 | 2 | C. annuum | Bell |
| UGA-CAPS-367 | 2 | C. annuum | Bell |
| UGA-CAPS-391 | 2 | C. annuum | Bell |
| UGA-CAPS-318 | 2 | C. annuum | Bell |
| UGA-CAPS-091 | 2 | C. annuum | Cayenne |
| UGA-CAPS-131 | 2 | C. annuum | Cayenne |
| UGA-CAPS-133 | 2 | C. annuum | Cayenne |
| UGA-CAPS-137 | 2 | C. annuum | Cayenne |
| UGA-CAPS-156 | 2 | C. annuum | Cayenne |
| UGA-CAPS-157 | 2 | C. annuum | Cayenne |
| UGA-CAPS-158 | 2 | C. annuum | Cayenne |
| UGA-CAPS-159 | 2 | C. annuum | Cayenne |
| UGA-CAPS-169 | 2 | C. annuum | Cayenne |
| UGA-CAPS-363 | 2 | C. annuum | Conical (Bell) |
| UGA-CAPS-068 | 2 | C. annuum | Habanero |
| UGA-CAPS-004 | 2 | C. annuum | Italian Frier |
| UGA-CAPS-006 | 2 | C. annuum | Italian Frier |
| UGA-CAPS-023 | 2 | C. annuum | Italian Frier |
| UGA-CAPS-087 | 2 | C. annuum | Italian Frier |
| UGA-CAPS-098 | 2 | C. annuum | Italian Frier |
| UGA-CAPS-170 | 2 | C. annuum | Italian Frier |
| UGA-CAPS-207 | 2 | C. annuum | Italian Frier |
| UGA-CAPS-226 | 2 | C. annuum | Italian Frier |
| UGA-CAPS-231 | 2 | C. annuum | Italian Frier |
| UGA-CAPS-275 | 2 | C. annuum | Italian Frier |
| UGA-CAPS-281 | 2 | C. annuum | Italian Frier |
| UGA-CAPS-301 | 2 | C. annuum | Italian Frier |
| UGA-CAPS-072 | 2 | C. annuum | Italian Frier |
| UGA-CAPS-022 | 2 | C. annuum | Finger Hot |
| UGA-CAPS-028 | 2 | C. annuum | Finger Hot |
| UGA-CAPS-030 | 2 | C. annuum | Finger Hot |
| UGA-CAPS-176 | 2 | C. annuum | Finger Hot |
| UGA-CAPS-208 | 2 | C. annuum | Finger Hot |
| UGA-CAPS-209 | 2 | C. annuum | Finger Hot |
| UGA-CAPS-225 | 2 | C. annuum | Finger Hot |
| UGA-CAPS-227 | 2 | C. annuum | Finger Hot |
| UGA-CAPS-229 | 2 | C. annuum | Finger Hot |
| UGA-CAPS-270 | 2 | C. annuum | Jalapeno |
| UGA-CAPS-093 | 2 | C. annuum | Mini Bell |
| UGA-CAPS-134 | 2 | C. annuum | Mini Bell |
| UGA-CAPS-139 | 2 | C. annuum | Mini Bell |
| UGA-CAPS-142 | 2 | C. annuum | Mini Bell |
| UGA-CAPS-150 | 2 | C. annuum | Mini Bell |
| UGA-CAPS-160 | 2 | C. annuum | Mini Bell |
| UGA-CAPS-274 | 2 | C. annuum | Mini Bell |
| UGA-CAPS-005 | 2 | C. annuum | Mini Sweet |
| UGA-CAPS-019 | 2 | C. annuum | Mini Sweet |
| UGA-CAPS-021 | 2 | C. annuum | Mini Sweet |
| UGA-CAPS-083 | 2 | C. annuum | Mini Sweet |
| UGA-CAPS-084 | 2 | C. annuum | Mini Sweet |
| UGA-CAPS-086 | 2 | C. annuum | Mini Sweet |
| UGA-CAPS-088 | 2 | C. annuum | Mini Sweet |
| UGA-CAPS-094 | 2 | C. annuum | Mini Sweet |
| UGA-CAPS-099 | 2 | C. annuum | Mini Sweet |
| UGA-CAPS-101 | 2 | C. annuum | Mini Sweet |
| UGA-CAPS-140 | 2 | C. annuum | Mini Sweet |
| UGA-CAPS-145 | 2 | C. annuum | Mini Sweet |
| UGA-CAPS-149 | 2 | C. annuum | Mini Sweet |
| UGA-CAPS-151 | 2 | C. annuum | Mini Sweet |
| UGA-CAPS-162 | 2 | C. annuum | Mini Sweet |
| UGA-CAPS-210 | 2 | C. annuum | Mini Sweet |
| UGA-CAPS-211 | 2 | C. annuum | Mini Sweet |
| UGA-CAPS-224 | 2 | C. annuum | Mini Sweet |
| UGA-CAPS-228 | 2 | C. annuum | Mini Sweet |
| UGA-CAPS-256 | 2 | C. annuum | Mini Sweet |
| UGA-CAPS-258 | 2 | C. annuum | Mini Sweet |
| UGA-CAPS-271 | 2 | C. annuum | Mini Sweet |
| UGA-CAPS-273 | 2 | C. annuum | Mini Sweet |
| UGA-CAPS-278 | 2 | C. annuum | Mini Sweet |
| UGA-CAPS-279 | 2 | C. annuum | Mini Sweet |
| UGA-CAPS-300 | 2 | C. annuum | Mini Sweet |
| UGA-CAPS-313 | 2 | C. annuum | Mini Sweet |
| UGA-CAPS-316 | 2 | C. annuum | Mini Sweet |
| UGA-CAPS-317 | 2 | C. annuum | Mini Sweet |
| UGA-CAPS-351 | 2 | C. annuum | Mini Sweet |
| UGA-CAPS-352 | 2 | C. annuum | Mini Sweet |
| UGA-CAPS-077 | 2 | C. annuum | Mini Sweet |
| UGA-CAPS-096 | 2 | C. annuum | Mini Sweet |
| UGA-CAPS-099 | 2 | C. annuum | Mini Sweet |
| UGA-CAPS-097 | 2 | C. annuum | Pepperoncini |
| UGA-CAPS-081 | 2 | C. annuum | Pimento |
| UGA-CAPS-080 | 2 | C. annuum | Pumpkin Shape |
| UGA-CAPS-085 | 2 | C. annuum | Pumpkin Shape |
| UGA-CAPS-095 | 2 | C. annuum | Pumpkin Shape |
| UGA-CAPS-276 | 2 | C. annuum | Pumpkin Shape |
| UGA-CAPS-312 | 2 | C. annuum | Pumpkin Shape |
| UGA-CAPS-302 | 2 | C. annuum | Pumpkin Shape |
| UGA-CAPS-349 | 2 | C. annuum | Habanero |
| UGA-CAPS-350 | 2 | C. annuum | Habanero |
| UGA-CAPS-272 | 2 | C. annuum | Serrano |
| UGA-CAPS-100 | 2 | C. annuum | Mini Bell |
| UGA-CAPS-148 | 2 | C. annuum | Mini Sweet |
| UGA-CAPS-308 | 2 | C. annuum | Pimiento |
| UGA-CAPS-309 | 2 | C. annuum | Pimiento |
| UGA-CAPS-310 | 2 | C. annuum | Mini Sweet |
| UGA-CAPS-434 | 2 | C. baccatum | Habanero |
| UGA-CAPS-435 | 2 | C. chacoense | Bird’s Eye |
| UGA-CAPS-436 | 2 | C. chinense | Cubanelle |
| UGA-CAPS-439 | 2 | C. chinense | Pimiento |
| UGA-CAPS-441 | 2 | C. frutescens | Bird’s Eye |
| UGA-CAPS-442 | 2 | C. galapagoense | Bird’s Eye |
| UGA-CAPS-444 | 2 | C. annuum | Bell |
| UGA-CAPS-445 | 2 | C. annuum | Bell |
| UGA-CAPS-446 | 2 | C. annuum | Jalapeno |
| UGA-CAPS-475 | 2 | C. annuum | Jalapeno |
| UGA-CAPS-476 | 2 | C. annuum | Bird’s Eye |
| UGA-CAPS-477 | 2 | C. annuum | Snack Type |
| UGA-CAPS-478 | 2 | C. annuum | Cayenne |
| UGA-CAPS-479 | 2 | C. annuum | Habanero |
| UGA-CAPS-480 | 2 | C. annuum | Habanero |
| UGA-CAPS-482 | 2 | C. annuum | Habanero |
| UGA-CAPS-483 | 2 | C. annuum | Mini Sweet |
| UGA-CAPS-484 | 2 | C. annuum | Mini Sweet |
| UGA-CAPS-485 | 2 | C. annuum | Finger Hot |
| PS 1498 | 2 | C. annuum | N/A |
| PS 1536 | 2 | C. annuum | N/A |
| PS 1634 | 2 | C. annuum | N/A |
| UGA-CAPS-010 | 3 | C. annuum | Banana |
| UGA-CAPS-011 | 3 | C. annuum | Banana |
| UGA-CAPS-065 | 3 | C. annuum | Banana |
| UGA-CAPS-183 | 3 | C. annuum | Banana |
| UGA-CAPS-185 | 3 | C. annuum | Banana |
| UGA-CAPS-189 | 3 | C. annuum | Banana |
| UGA-CAPS-193 | 3 | C. annuum | Banana |
| UGA-CAPS-194 | 3 | C. annuum | Banana |
| UGA-CAPS-197 | 3 | C. annuum | Banana |
| UGA-CAPS-198 | 3 | C. annuum | Banana |
| UGA-CAPS-201 | 3 | C. annuum | Banana |
| UGA-CAPS-202 | 3 | C. annuum | Banana |
| UGA-CAPS-203 | 3 | C. annuum | Banana |
| UGA-CAPS-232 | 3 | C. annuum | Banana |
| UGA-CAPS-283 | 3 | C. annuum | Banana |
| UGA-CAPS-288 | 3 | C. annuum | Banana |
| UGA-CAPS-245 | 3 | C. annuum | Banana |
| UGA-CAPS-001 | 3 | C. annuum | Bell |
| UGA-CAPS-009 | 3 | C. annuum | Bell |
| UGA-CAPS-057 | 3 | C. annuum | Bell |
| UGA-CAPS-064 | 3 | C. annuum | Bell |
| UGA-CAPS-125 | 3 | C. annuum | Bell |
| UGA-CAPS-195 | 3 | C. annuum | Bell |
| UGA-CAPS-240 | 3 | C. annuum | Bell |
| UGA-CAPS-249 | 3 | C. annuum | Bell |
| UGA-CAPS-250 | 3 | C. annuum | Bell |
| UGA-CAPS-285 | 3 | C. annuum | Bell |
| UGA-CAPS-337 | 3 | C. annuum | Bell |
| UGA-CAPS-338 | 3 | C. annuum | Bell |
| UGA-CAPS-344 | 3 | C. annuum | Bell |
| UGA-CAPS-377 | 3 | C. annuum | Bell |
| UGA-CAPS-378 | 3 | C. annuum | Bell |
| UGA-CAPS-379 | 3 | C. annuum | Bell |
| UGA-CAPS-380 | 3 | C. annuum | Bell |
| UGA-CAPS-382 | 3 | C. annuum | Bell |
| UGA-CAPS-383 | 3 | C. annuum | Bell |
| UGA-CAPS-384 | 3 | C. annuum | Bell |
| UGA-CAPS-385 | 3 | C. annuum | Bell |
| UGA-CAPS-386 | 3 | C. annuum | Bell |
| UGA-CAPS-387 | 3 | C. annuum | Bell |
| UGA-CAPS-388 | 3 | C. annuum | Bell |
| UGA-CAPS-389 | 3 | C. annuum | Bell |
| UGA-CAPS-390 | 3 | C. annuum | Bell |
| UGA-CAPS-392 | 3 | C. annuum | Bell |
| UGA-CAPS-237 | 3 | C. annuum | Bell |
| UGA-CAPS-127 | 3 | C. annuum | Cayenne |
| UGA-CAPS-129 | 3 | C. annuum | Cayenne |
| UGA-CAPS-192 | 3 | C. annuum | Cayenne |
| UGA-CAPS-200 | 3 | C. annuum | Cayenne |
| UGA-CAPS-340 | 3 | C. annuum | Bird’s Eye |
| UGA-CAPS-002 | 3 | C. annuum | Italian Frier |
| UGA-CAPS-003 | 3 | C. annuum | Italian Frier |
| UGA-CAPS-012 | 3 | C. annuum | Italian Frier |
| UGA-CAPS-016 | 3 | C. annuum | Italian Frier |
| UGA-CAPS-058 | 3 | C. annuum | Italian Frier |
| UGA-CAPS-060 | 3 | C. annuum | Italian Frier |
| UGA-CAPS-061 | 3 | C. annuum | Italian Frier |
| UGA-CAPS-062 | 3 | C. annuum | Italian Frier |
| UGA-CAPS-063 | 3 | C. annuum | Italian Frier |
| UGA-CAPS-135 | 3 | C. annuum | Italian Frier |
| UGA-CAPS-184 | 3 | C. annuum | Italian Frier |
| UGA-CAPS-187 | 3 | C. annuum | Italian Frier |
| UGA-CAPS-188 | 3 | C. annuum | Italian Frier |
| UGA-CAPS-196 | 3 | C. annuum | Italian Frier |
| UGA-CAPS-233 | 3 | C. annuum | Italian Frier |
| UGA-CAPS-234 | 3 | C. annuum | Italian Frier |
| UGA-CAPS-235 | 3 | C. annuum | Italian Frier |
| UGA-CAPS-241 | 3 | C. annuum | Italian Frier |
| UGA-CAPS-243 | 3 | C. annuum | Italian Frier |
| UGA-CAPS-292 | 3 | C. annuum | Italian Frier |
| UGA-CAPS-298 | 3 | C. annuum | Italian Frier |
| UGA-CAPS-056 | 3 | C. annuum | Finger Hot |
| UGA-CAPS-242 | 3 | C. annuum | Finger Hot |
| UGA-CAPS-013 | 3 | C. annuum | Lamayo |
| UGA-CAPS-014 | 3 | C. annuum | Lamayo |
| UGA-CAPS-122 | 3 | C. annuum | Mini Bell |
| UGA-CAPS-128 | 3 | C. annuum | Mini Bell |
| UGA-CAPS-130 | 3 | C. annuum | Mini Bell |
| UGA-CAPS-238 | 3 | C. annuum | Mini Bell |
| UGA-CAPS-239 | 3 | C. annuum | Mini Bell |
| UGA-CAPS-251 | 3 | C. annuum | Mini Bell |
| UGA-CAPS-286 | 3 | C. annuum | Mini Bell |
| UGA-CAPS-291 | 3 | C. annuum | Mini Bell |
| UGA-CAPS-339 | 3 | C. annuum | Mini Bell |
| UGA-CAPS-015 | 3 | C. annuum | Mini Sweet |
| UGA-CAPS-018 | 3 | C. annuum | Mini Sweet |
| UGA-CAPS-124 | 3 | C. annuum | Mini Sweet |
| UGA-CAPS-126 | 3 | C. annuum | Mini Sweet |
| UGA-CAPS-190 | 3 | C. annuum | Mini Sweet |
| UGA-CAPS-247 | 3 | C. annuum | Mini Sweet |
| UGA-CAPS-248 | 3 | C. annuum | Mini Sweet |
| UGA-CAPS-287 | 3 | C. annuum | Mini Sweet |
| UGA-CAPS-289 | 3 | C. annuum | Mini Sweet |
| UGA-CAPS-294 | 3 | C. annuum | Mini Sweet |
| UGA-CAPS-295 | 3 | C. annuum | Mini Sweet |
| UGA-CAPS-296 | 3 | C. annuum | Mini Sweet |
| UGA-CAPS-299 | 3 | C. annuum | Mini Sweet |
| UGA-CAPS-330 | 3 | C. annuum | Mini Sweet |
| UGA-CAPS-331 | 3 | C. annuum | Mini Sweet |
| UGA-CAPS-332 | 3 | C. annuum | Mini Sweet |
| UGA-CAPS-333 | 3 | C. annuum | Mini Sweet |
| UGA-CAPS-336 | 3 | C. annuum | Mini Sweet |
| UGA-CAPS-343 | 3 | C. annuum | Mini Sweet |
| UGA-CAPS-123 | 3 | C. annuum | Mini Sweet |
| UGA-CAPS-017 | 3 | C. annuum | Pepperoncini |
| UGA-CAPS-347 | 3 | C. annuum | Pimiento |
| UGA-CAPS-284 | 3 | C. annuum | Pumpkin Shape |
| UGA-CAPS-280 | 3 | C. annuum | Pumpkin Shape |
| UGA-CAPS-059 | 3 | C. annuum | Pumpkin Shape |
| UGA-CAPS-236 | 3 | C. annuum | Pumpkin Shape |
| UGA-CAPS-282 | 3 | C. annuum | Pumpkin Shape |
| UGA-CAPS-297 | 3 | C. annuum | Pumpkin Shape |
| UGA-CAPS-329 | 3 | C. annuum | Pumpkin Shape |
| UGA-CAPS-335 | 3 | C. annuum | Pumpkin Shape |
| UGA-CAPS-345 | 3 | C. annuum | Pumpkin Shape |
| UGA-CAPS-346 | 3 | C. annuum | Pumpkin Shape |
| UGA-CAPS-191 | 3 | C. annuum | Serrano |
| UGA-CAPS-244 | 3 | C. annuum | Mini Bell |
| UGA-CAPS-246 | 3 | C. annuum | Mini Sweet |
| UGA-CAPS-290 | 3 | C. annuum | Banana |
| UGA-CAPS-341 | 3 | C. annuum | Mini Bell |
| UGA-CAPS-342 | 3 | C. annuum | Bell |
| UGA-CAPS-348 | 3 | C. annuum | Mini Sweet |
| UGA-CAPS-393 | 3 | C. annuum | Bell |
| UGA-CAPS-394 | 3 | C. annuum | Cayenne |
| UGA-CAPS-395 | 3 | C. annuum | Bell |
| UGA-CAPS-396 | 3 | C. annuum | Jalapeno |
| UGA-CAPS-397 | 3 | C. annuum | Bell |
| UGA-CAPS-398 | 3 | C. annuum | Cayenne |
| UGA-CAPS-399 | 3 | C. annuum | Finger Hot |
| UGA-CAPS-403 | 3 | C. annuum | Pimiento |
| UGA-CAPS-405 | 3 | C. annuum | Finger Hot |
| UGA-CAPS-407 | 3 | C. annuum | Finger Hot |
| UGA-CAPS-408 | 3 | C. annuum | Finger Hot |
| UGA-CAPS-410 | 3 | C. annuum | Finger Hot |
| UGA-CAPS-411 | 3 | C. annuum | Finger Hot |
| UGA-CAPS-412 | 3 | C. annuum | Cayenne |
| UGA-CAPS-413 | 3 | C. annuum | Tapered Cone |
| UGA-CAPS-414 | 3 | C. annuum | Finger Hot |
| UGA-CAPS-415 | 3 | C. annuum | Finger Hot |
| UGA-CAPS-416 | 3 | C. annuum | Finger Hot |
| UGA-CAPS-417 | 3 | C. annuum | Finger Hot |
| UGA-CAPS-418 | 3 | C. annuum | Finger Hot |
| UGA-CAPS-420 | 3 | C. annuum | Finger Hot |
| UGA-CAPS-421 | 3 | C. annuum | Finger Hot |
| UGA-CAPS-422 | 3 | C. annuum | Cubanelle |
| UGA-CAPS-423 | 3 | C. annuum | Cayenne |
| UGA-CAPS-424 | 3 | C. annuum | Finger Hot |
| UGA-CAPS-466 | 3 | C. annuum | Bell |
| UGA-CAPS-467 | 3 | C. annuum | Anaheim |
| UGA-CAPS-468 | 3 | C. annuum | Jalapeno |
| UGA-CAPS-469 | 3 | C. annuum | Bell |
| UGA-CAPS-470 | 3 | C. annuum | Cubanelle |
| UGA-CAPS-471 | 3 | C. annuum | Bell |
| UGA-CAPS-472 | 3 | C. annuum | Bell |
| UGA-CAPS-473 | 3 | C. annuum | Snack Type |
| UGA-CAPS-474 | 3 | C. annuum | Bird’s Eye |

**Supplementary Figures**


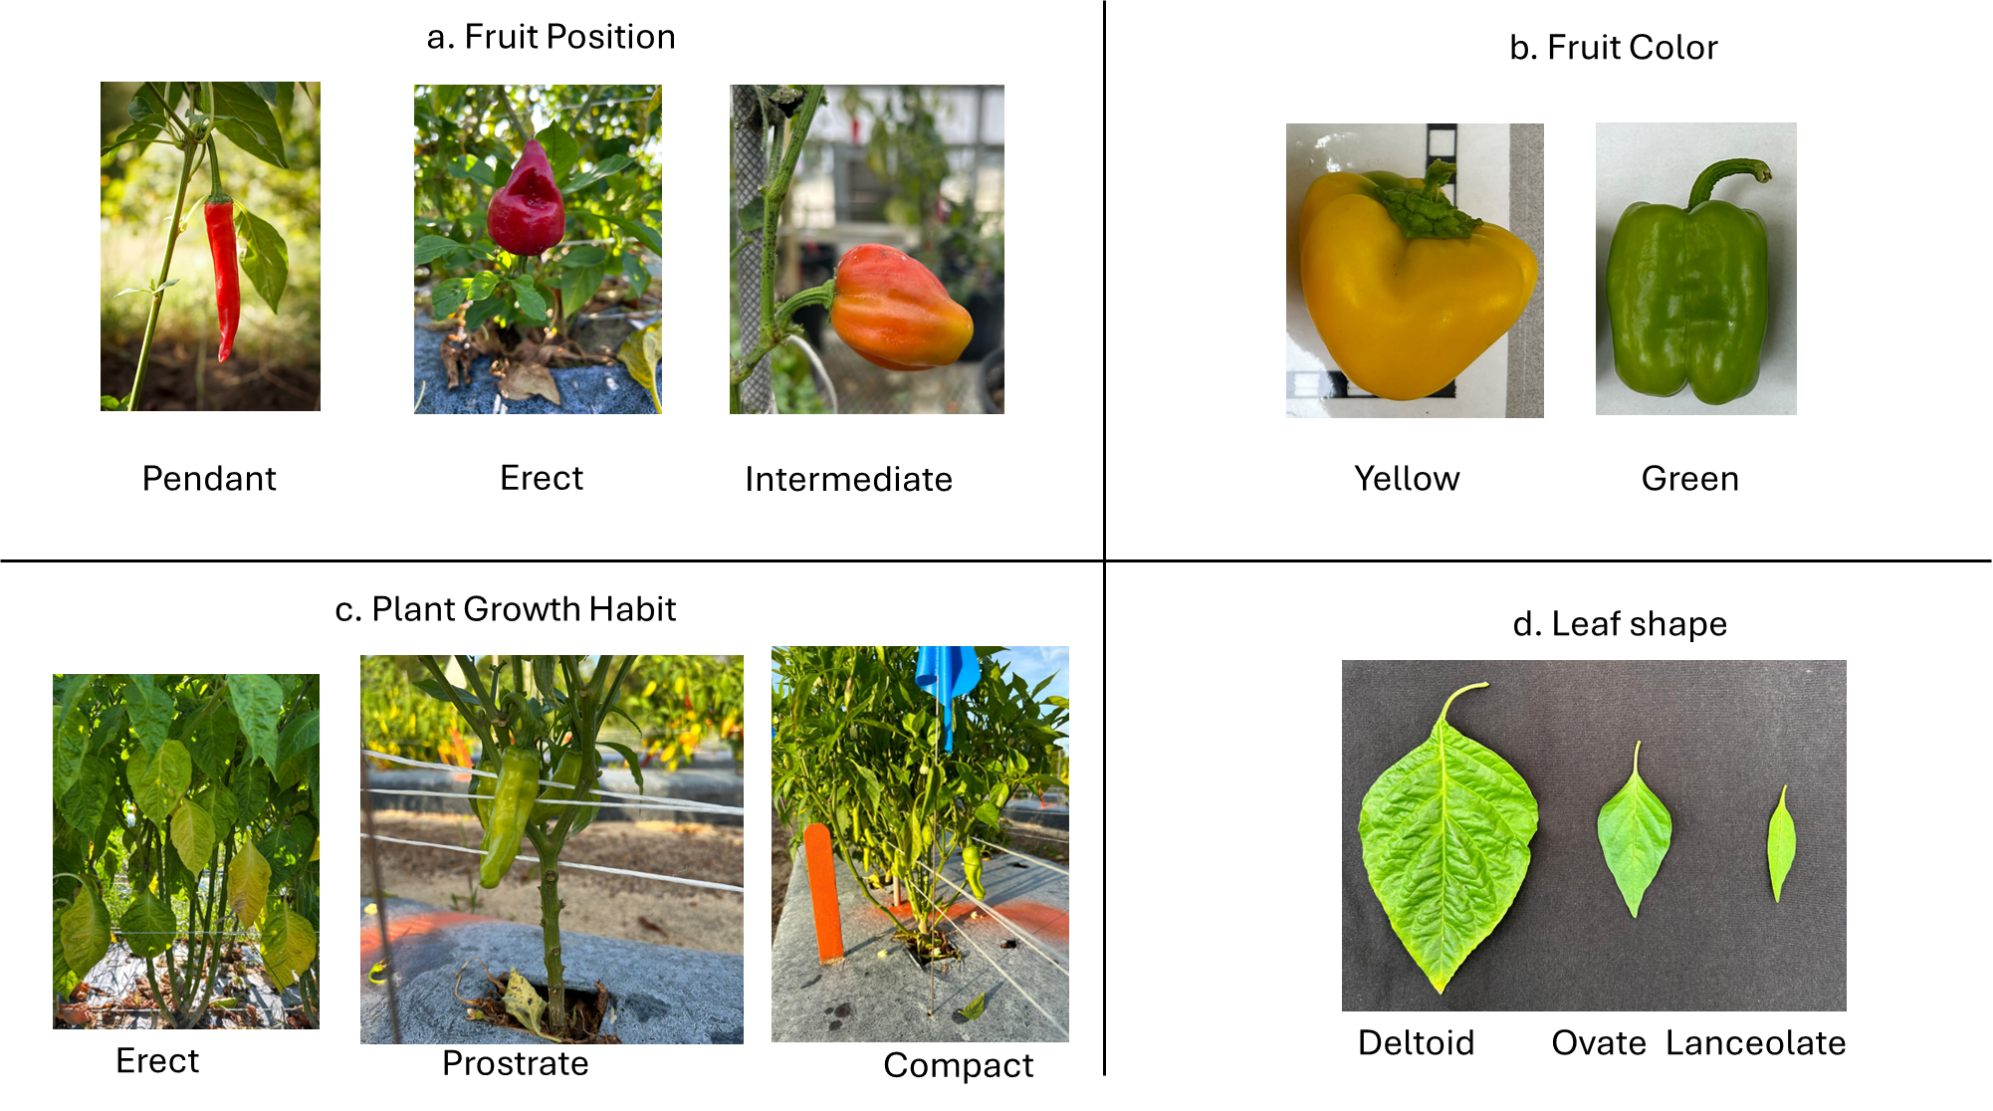


**Supplementary Figure 1** Qualitative characteristics measured across the six varietal groups in the current study. **a** Fruit position is categorized as pendant, erect and intermediate **b** Fruit color is measured as yellow, green and red **c** Plant growth habit is measured as erect, prostrate and compact **d** Leaf shape is categorized as deltoid, ovate and lanceolate.

**
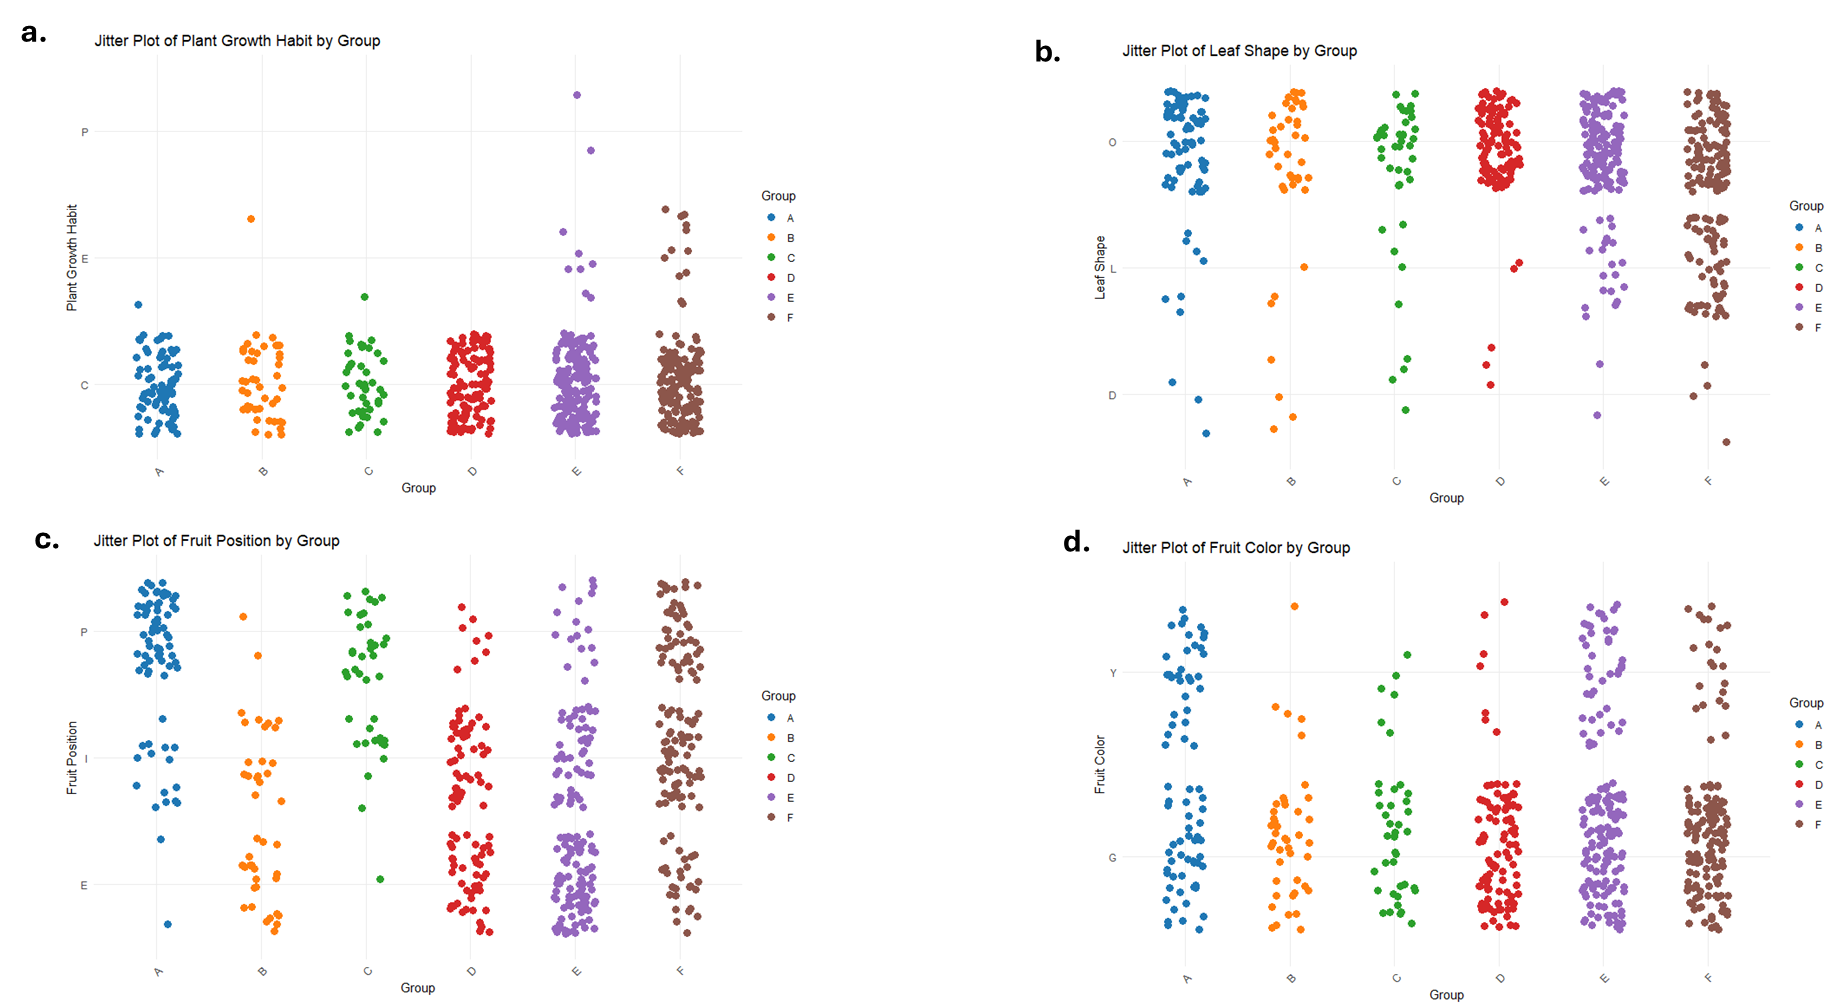
**

**Supplementary Figure 2** Categorical distribution of 4 qualitative traits across varietal groups of UGA-CAPS pepper accessions **a** P- Prostrate; E- Erect, C- Composite. **b** O- Ovate, L- Lanceolate, D – Deltoid **c** P- Pendant, I – Intermediate, E- Erect, **d** Y- Yellow, G- Green

**
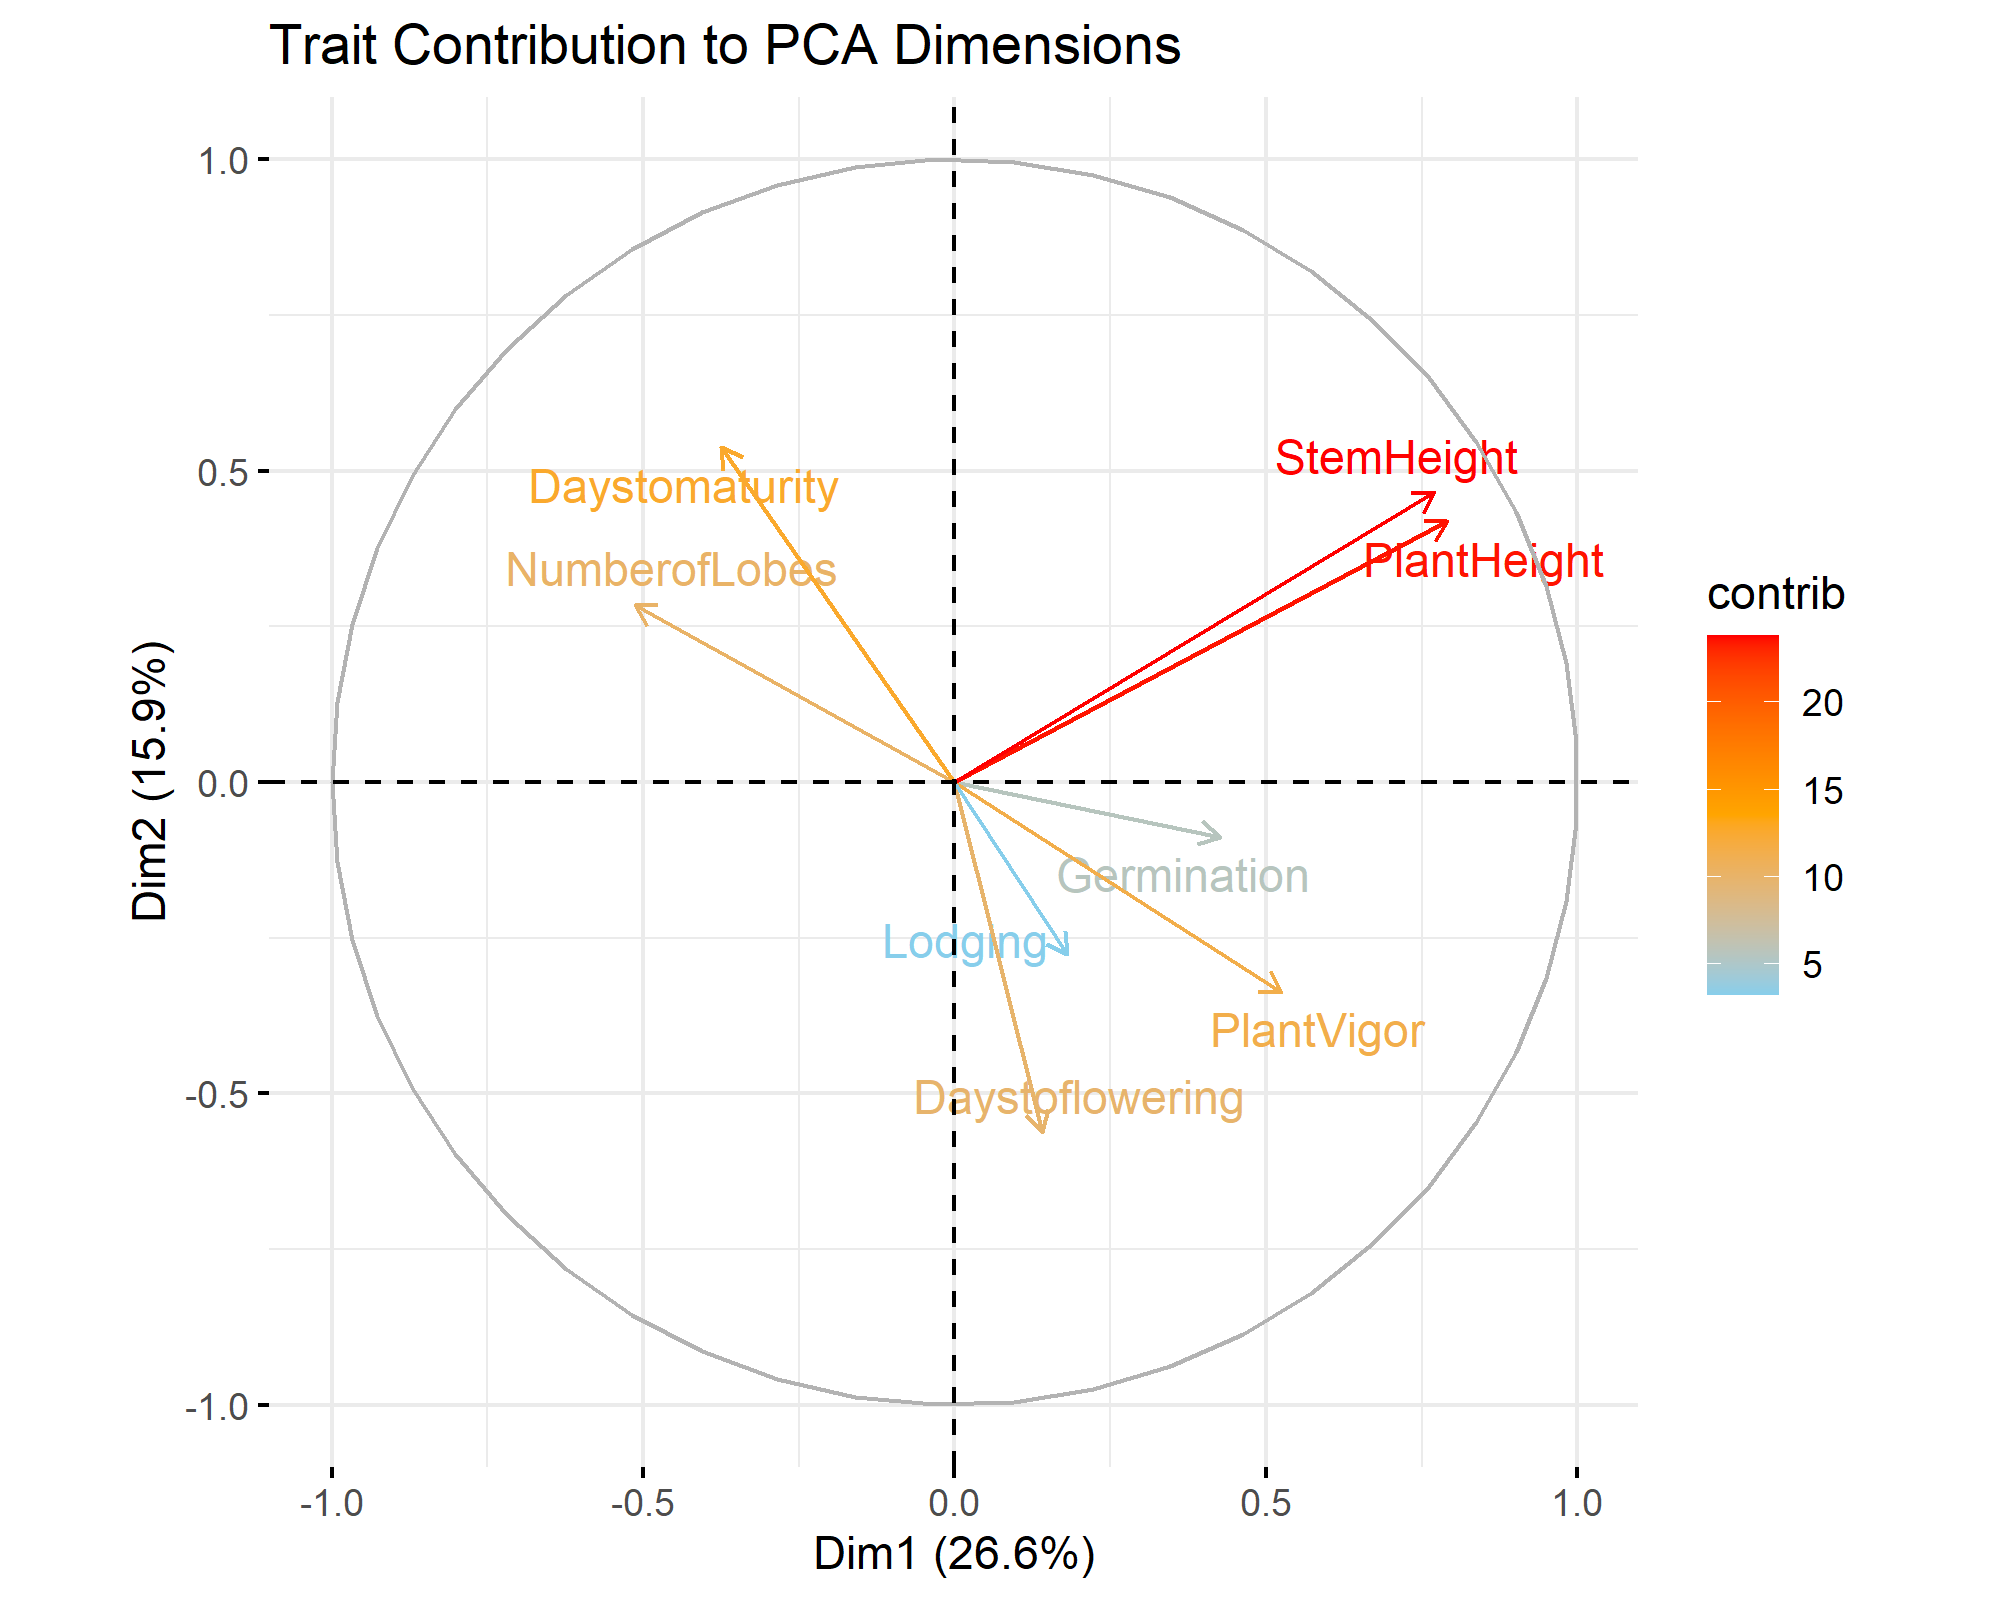
**

**Supplementary Figure 3** Trait contributions to PCA (PC1–PC2). A variable factor map showing the contributions of eight quantitative traits to the first two principal components (Dim1 and Dim2), which explained 26.6% and 15.9% of the variance, respectively. Arrow length and direction indicate the strength and correlation of each trait with the axes, while color intensity reflects the percentage contribution. Traits such as Plant Height and Main stem Height loaded strongly on PC1, while Days to Flowering and Days to Maturity were mostly associated with PC2.


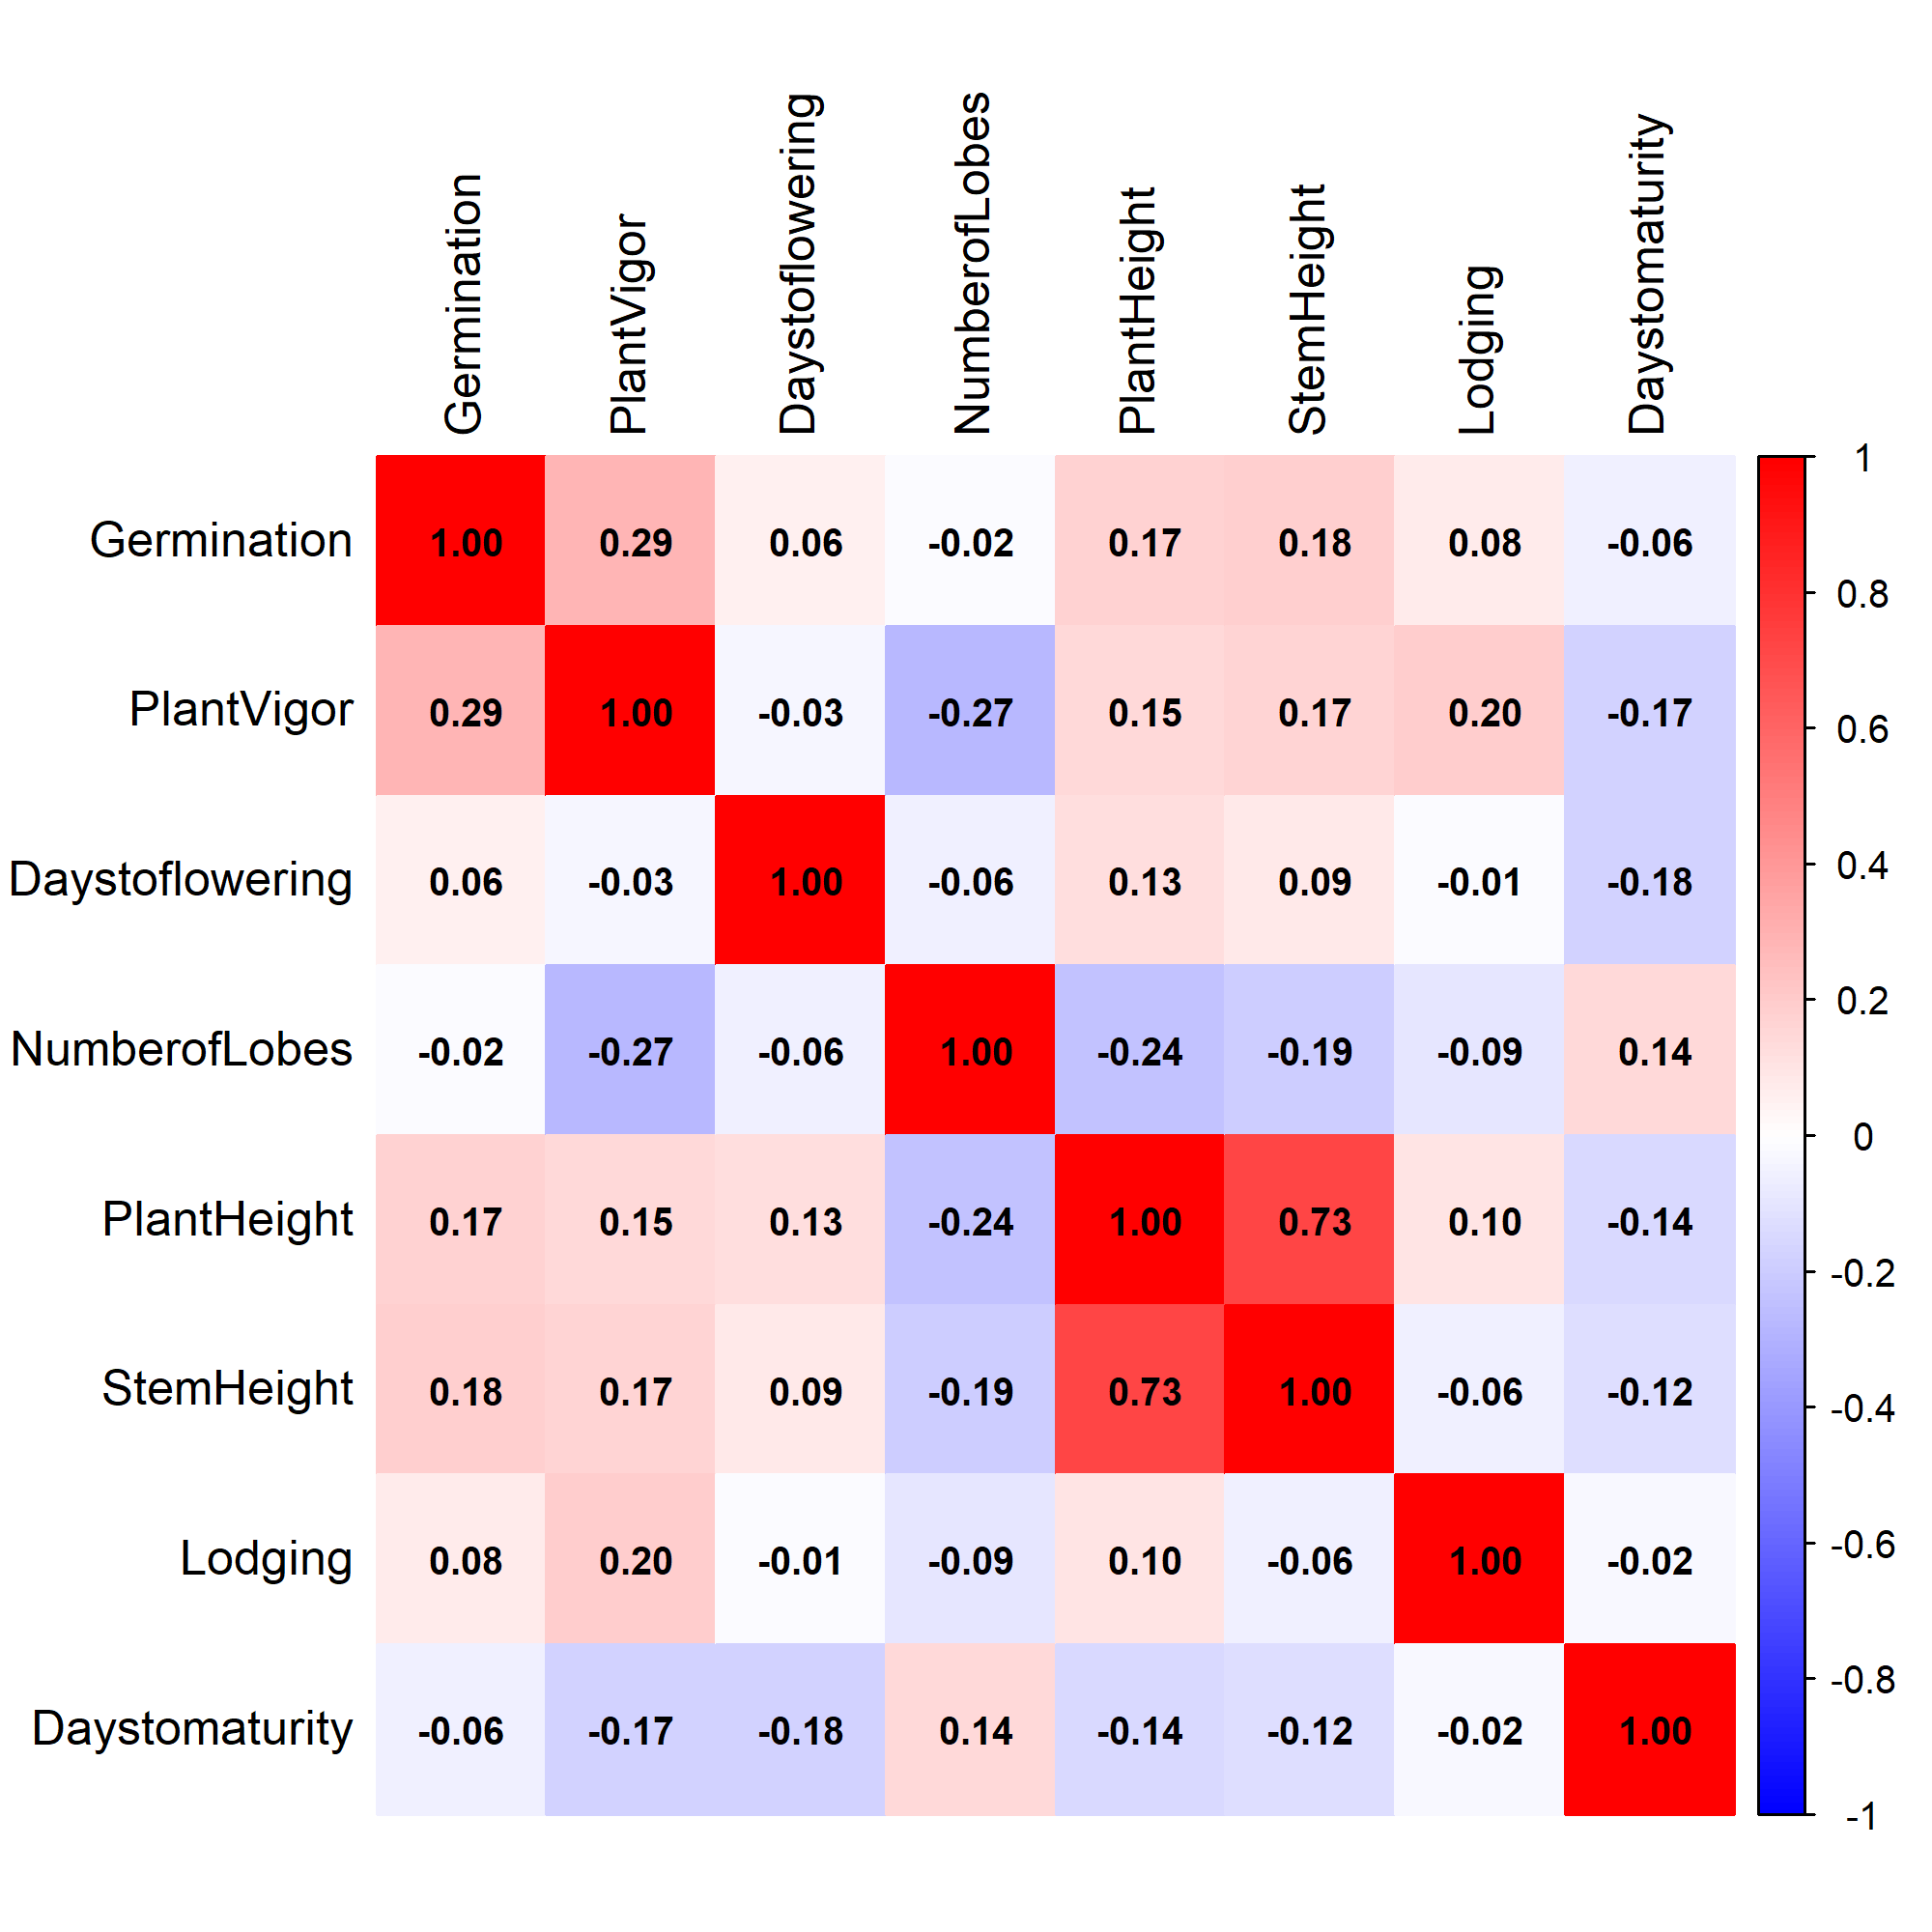


**Supplementary Figure 4** Pearson correlation matrix of quantitative traits for the UGA-Capsi-Core pepper accessions
